# Supplementary material for: New global characterisation of landslide exposure
Source: Copernicus journal article supplement (doi:10.5194/nhess-20-3413-2020), 2020-12-14
Supplement: Supplementary file 1 [file nhess-20-3413-2020-supplement.zip]

Archive with 3 entries (3 files):
- Supplementary_figures.pdf
- nhess-20-3413-2020-supplement-title-page.pdf
- SUPPLEMENTARY_TABLE_1_post_revision.xls
