# Supplementary material for: New global characterisation of landslide exposure
Source: Copernicus journal article supplement (doi:10.5194/nhess-20-3413-2020), 2020-12-14
Supplement: Supplementary file 1 [file nhess-20-3413-2020-supplement.zip › nhess-20-3413-2020-supplement-title-page.pdf]

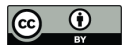

## *Supplement of*

## **New global characterisation of landslide exposure**

**Robert Emberson et al.**

*Correspondence to:* Robert Emberson ([robert.a.emberson@nasa.gov](mailto:robert.a.emberson@nasa.gov))

- [nhess-20-3413-2020-supplement-title-page.pdf](#)
- [SUPPLEMENTARY\\_TABLE\\_1\\_post\\_revision.xls](#)
- [Supplementary\\_figures.pdf](#)

The copyright of individual parts of the supplement might differ from the CC BY 4.0 License.
