# Supplementary material for: New global characterisation of landslide exposure
Source: Copernicus journal article supplement (doi:10.5194/nhess-20-3413-2020), 2020-12-14
Supplement: Supplementary file 1 [file nhess-20-3413-2020-supplement.zip › SUPPLEMENTARY_TABLE_1_post_revision.xls]

## Sheet: Sheet1
This Data Table accompanies Emberson et al. (in review for NHESS). It contains the country-by-country data on population, roads and infrastructure, as discussed in the main text.
The data includes the annual mean and standard deviation for Nowcasts (see main text) which are the unit for landslide hazard.
The Nowcasts are used to estimate the exposure of each of the elements mentioned above to landslide hazard.
Additionally, some accompanying data is included: 2018 GDP and population from the World Bank, Fatalities due to rainfall induced landslides from Froude and Petley, 2018, OpenStreetMap completeness from Barrington-Leigh and Millard-Ball 2018, and sum of GDP deciles for landslide economic loss from Dilley et al. 2005
Country	Continent	Sum of road density derived from GRIP roads dataset (sum of km / 30-arc second cell)	Hospitals, Fuel Stations, Schools	OSM Power Nodes	Estimated OSM completeness fraction: Barrington-Leigh and Millard-Ball 2018 (fraction)	Nowcasts per year: average	Nowcasts per year: standard deviation	Mean annual exposure of fuel stations	Standard deviation of annual fuel station exposure	Mean of annual hospital exposure	Standard deviation of annual hospital exposure	Mean of annual population exposure	Standard deviation of annual population exposure	Mean of annual power node exposure	Standard deviation of annual power node exposure	Mean of annual road exposure	Standard deviation of annual road exposure	Mean of annual school exposure	Standard deviation of annual school exposure	Critical Infrastructure (no power nodes): annual mean	Critical Infrastructure (no power nodes): standard deviation	Critical Infrastructure including power nodes: mean	Critical Infrastructure including power nodes: standard deviation	Fatalities: Froude & Petley 2018	Area, square decimal degrees	2018 GDP per capita (USD): World Bank, 2019	2018 Population: World Bank, 2019	Sum of GDP deciles from Dilley et al. 2005 in each country
Zimbabwe	Africa	864887	1855	14026	0.678412	586669	181097	264.316	76.9416	124.263	37.5187	2.76633e+07	8.86663e+06	11488.4	3687.13	5.6004e+06	1.73441e+06	353.105	109.599	741.684	224.059	12230.1	3911.19	2	33.3894	2147	14439018
Zambia	Africa	508788	17133	41933	0.718235	600628	129530	212	59.5371	35.7368	9.67151	1.13891e+07	2.48622e+06	17289.1	4190.4	3.24244e+06	677070	247.263	67.742	495	136.951	17784.1	4327.35	22	62.8869	1539.9	17351822
Yemen	Asia	511029	6712	2986	0.73221	4.12447e+06	1.15499e+06	4046.32	1144.28	30919.5	7423.26	3.73044e+08	8.94746e+07	15690.2	4400.16	5.19553e+07	1.22577e+07	3067	841.654	38032.8	9409.2	53723.1	13809.4	122	38.2043	944.408	28498687
Vietnam	Asia	2340029	31536	27174	0.474667	4.58264e+06	422772	11014.3	1107.71	656.421	62.6315	5.1737e+08	5.35267e+07	176853	20796.8	2.10914e+08	2.13238e+07	1703.47	195.582	13374.2	1365.92	190227	22162.7	684	27.8569	2563.82	95540395	1459
Venezuela	South America	1445149	12177	28458	0.68254	5.2702e+06	912859	10140.1	3215.43	3830.68	1210.05	3.5591e+08	1.03862e+08	169334	43546.3	6.43863e+07	1.82487e+07	13891.6	4392.79	27862.4	8818.27	197197	52364.5	66	74.5943		28870195	6409
Vatican	Europe		32		1	17.9474	6.42455	17.9474	6.42455	35.8947	12.8491	190455	68176.4			19365.2	6932.09			53.8421	19.2737	53.8421	19.2737		7.68e-05
Vanuatu	Oceania	5079	412	5	1	171706	34077.5	162	45.793	71.4737	18.6648	2.69026e+06	538049	35.7895	8.34385	560317	121879	608.789	140.721	842.263	205.179	878.053	213.523	7	0.951479	3033.41	292680	759
Uzbekistan	Asia	988359	13709	70422	0.25957	1.12395e+06	372954	792.789	234.291	266.684	74.983	1.48514e+08	4.4858e+07	176397	53470.2	1.26728e+07	4.02337e+06	107.263	28.9978	1166.74	338.272	177564	53808.5	12	48.5269	1532.37	32955400	5326
Uruguay	South America	998489	5385	21206	1	32288.6	9240.51					61006.7	17114.9	1807.16	446.164	1.36167e+06	391684	17.7895	5.97754	17.7895	5.97754	1824.95	452.142	0	17.088	17278	3449299
Micronesia	Oceania	0	102	91	1	871.789	235.329					190466	51371.3	733.684	329.107			558.421	173.301	558.421	173.301	1292.11	502.408	0	0.042757	3058.43	112640
Marshall Is.	Oceania		10		1															0	0	0	0		0.0193504	3621.17	58413
N. Mariana Is.	Oceania	1077	81	1	0.937158	4427.74	1200.8					254602	89870	18.0526	6.536	117906	34672.3			0	0	18.0526	6.536		0.0330919		56882
U.S. Virgin Is.	Central America and Caribbean	26733	162	6	1	4786.32	1996.19	107.368	49.1305	71.4211	30.542	1.40648e+06	602104	35.6842	15.0999	1.59978e+06	668571	250.421	108.83	429.211	188.502	464.895	203.602	0	0.0268508		106977
Guam	Oceania	1426	436	68	1	3800.63	990.707	53.8421	14.6449	108.684	28.7229	713780	185884	915.421	248.611	127914	33443.1	179.526	46.2438	342.053	89.6116	1257.47	338.223	0	0.0401015		165768
American Samoa	Oceania	250	45		0.869968	1934	593.31	70.9474	22.2048			629381	193920			21035.9	6580.54	177.474	54.6985	248.421	76.9033	248.421	76.9033	0	0.0100496		55465
Puerto Rico	Central America and Caribbean	358843	5253	12179	0.990398	135676	49463	1275.95	427.707	373.842	126.174	3.57031e+07	1.22374e+07	128515	45255.9	2.07948e+07	7.22581e+06	13716.1	4838.14	15365.8	5392.02	143881	50647.9	4	0.761544	31651.3	3195153	260
United States of America	North America	49575783	921594	2716126	0.991728	5.28061e+07	9.64097e+06	54609.2	10466.6	19058.1	3559.45	6.95097e+08	1.41563e+08	5.11882e+06	1.00377e+06	8.18362e+08	1.5343e+08	188438	36052.4	262105	50078.5	5.38093e+06	1.05385e+06	178	873.325	62641	327167434
Cayman Is.	Central America and Caribbean	41337	203	1	1	73.0526	19.4978					2264.99	604.527			11505.8	3070.9	36.5263	9.74889	36.5263	9.74889	36.5263	9.74889		0.0258417		64174
Bermuda	Central America and Caribbean	253	85	2	1															0	0	0	0	0	0.00631423		63968
British Virgin Is.	Central America and Caribbean		59	3	0.984012	1674.42	741.379	17.9474	8.6953			489763	223710	53.8947	25.3944	338199	153863	35.9474	16.7248	53.8947	25.4201	107.789	50.8145	0	0.0115458		29802
Turks and Caicos Is.	Central America and Caribbean	687	76	5	0.998217															0	0	0	0	0	0.0287705	27142.2	37665
United Kingdom	Europe	5047647	363953	435354	1	2.32319e+06	467458	8442	1753.57	2595.47	567.972	1.44794e+08	3.15383e+07	976358	190977	9.05658e+07	1.82866e+07	36413.4	8206.96	47450.9	10528.5	1.02381e+06	201506	10	33.095	42491.4	66488991	97
United Arab Emirates	Asia	212872	13045	24402	1	125250	50208.2	670.842	261.467	331.421	148.703	1.88232e+07	7.56614e+06	40225.1	15623.8	2.20534e+06	871045	539.211	211.679	1541.47	621.849	41766.6	16245.7	2	6.30611	43004.9	9630959
Ukraine	Europe	4014316	88910	636531	0.936761	991296	222671	5759.53	1024.22	1863.79	339.941	9.01736e+07	1.80426e+07	351586	69049.5	3.26849e+07	6.73585e+06	4722.05	984.21	12345.4	2348.37	363931	71397.8	7	70.5363	3095.17	44622516	767
Uganda	Africa	243598	69945	9141	0.54518	660234	89774.1	1018.05	193.434	1519.42	233.457	1.43927e+08	2.12006e+07	14680.6	2437.83	5.09668e+06	738839	79766.1	12205.4	82303.5	12632.3	96984.1	15070.1	568	19.6279	643.14	42723139
Turkmenistan	Asia	3334142	1269	26230	0.772148	763924	233559	299.526	92.9177	175.474	59.2137	7.41242e+06	2.31453e+06	10055.2	3219.56	3.33687e+07	1.01482e+07	246.263	82.4647	721.263	234.596	10776.4	3454.16	25	49.0776	6966.64	5850908	230
Turkey	Asia	6650310	51609	122087	0.791228	1.34553e+07	3.08455e+06	46396	10706.6	2695.84	658.507	1.12006e+09	2.67625e+08	962941	224098	5.75267e+08	1.32735e+08	9279.84	2195.68	58371.7	13560.8	1.02131e+06	237659	159	81.25	9311.37	82319724	95847
Tunisia	Africa	305483	5105	12469	0.927699	501007	145406	142	38.8401	212.421	61.9268	4.10062e+07	1.23409e+07	26353.5	7511.74	4.90502e+06	1.45339e+06	531.789	165.51	886.211	266.276	27239.7	7778.02	0	15.3111	3446.61	11565204
Trinidad and Tobago	Central America and Caribbean	8398	2132	42	1	32434.7	7106.31	291	62.7579	164.579	32.4728	1.00718e+07	2.09962e+06	290.632	70.0335	324361	71870.9	1419.79	299.402	1875.37	394.633	2166	464.666	10	0.419654	16843.7	1389858	178
Tonga	Oceania	1984	156	114	0.00698892	2406.95	723.447	35.6842	10.9598	17.8421	5.47989	165009	49958.5			60965.8	19022.8	17.8421	5.47989	71.3684	21.9196	71.3684	21.9196	0	0.0372513	4364.02	103197
Togo	Africa	89432	5243	1993	0.773857	140580	24565.8	165.316	35.6153	182.105	34.3299	1.06345e+07	1.78352e+06	2087.32	384.081	755636	120779	769	139.032	1116.42	208.978	3203.74	593.059	0	4.67422	671.841	7889094
Timor-Leste	Asia	203874	362	329	0.69125	245310	72579.1	70.1579	19.7041	1625.16	485.442	1.87058e+07	5.35428e+06	3310.47	984.126	3.14421e+07	9.29791e+06	315.684	96.323	2011	601.469	5321.47	1585.59	0	1.22944	2035.53	1267972	710
Thailand	Asia	3205441	59482	42504	0.770836	4.17422e+06	678623	27587.5	5292.1	2479.58	374.003	2.48477e+08	4.1177e+07	92142.3	15895.9	7.76352e+07	1.26996e+07	9008.26	1439.13	39075.3	7105.23	131218	23001.2	181	43.2787	7273.56	69428524	1035
Tanzania	Africa	496432	24317	19678	0.59032	3.15084e+06	722744	936.211	248.918	2138	500.786	1.89761e+08	4.64247e+07	34288.1	8164.53	1.08454e+07	2.40074e+06	212819	51644.6	215893	52394.3	250181	60558.9	83	77.0375	1050.68	56318348
Tajikistan	Asia	246160	3014	12955	0.372937	2.50423e+06	892676	1934.79	734.447	744.632	282.757	1.19657e+08	4.21136e+07	90384.4	31885.2	2.39389e+07	8.68417e+06	2555.37	982.2	5234.79	1999.4	95619.2	33884.6	83	14.713	826.622	9100837	12246
Taiwan	Asia	986449	59053	26927	0.90883	598615	182091	4397.37	1379.87	541.263	179.507	1.71542e+08	5.75844e+07	264260	82936.8	5.63701e+07	1.75336e+07	3615.53	1246.79	8554.16	2806.18	272814	85743	683	3.18084			9943
Syria	Asia	543113	4349	62362	1	402670	132383	831.421	306.443	848.684	302.722	8.22157e+07	2.9311e+07	72867.9	24975.6	1.23076e+07	4.2834e+06	1908.21	705.458	3588.32	1314.62	76456.3	26290.2	0	18.3483		16906283
Switzerland	Europe	845829	137868	122640	1	1.07876e+06	250186	60873.2	13741.9	3652.58	832.488	1.66155e+08	3.83935e+07	1.53495e+06	361487	8.78355e+07	2.02884e+07	20802.3	4731.12	85328	19305.5	1.62027e+06	380792	17	4.86846	82838.9	8516543	6810
Sweden	Europe	3056448	47932	59393	0.913812	534714	115521	8756.79	2025.82	144.421	30.5365	3.18675e+07	6.89647e+06	100871	22784.8	2.91611e+07	6.20509e+06	2613.26	563.265	11514.5	2619.62	112386	25404.5	2	21.7591	54112	10183175
eSwatini	Africa	36210	304	1391	0.820661	179055	53297.4	215	68.0531	107.263	32.3193	1.35877e+07	4.09801e+06	5269.42	1588.34	1.37513e+06	411960	214.947	67.0559	537.211	167.428	5806.63	1755.77	1	1.53645	4139.96	1136191
Suriname	South America	22944	833	364	0.97011	705129	161943	17.6842	5.45744			273975	63269.9	303.474	75.1017	389699	88540.4			17.6842	5.45744	321.158	80.5591	7	11.8062	5950.21	575991
S. Sudan	Africa	389591	796	1453	0.575738	339992	39311.9	18.1053	3.8858	36	6.83943	1.41864e+07	1.64468e+06			2141877	228288	54.3684	9.10562	108.474	19.8308	108.474	19.8308	0	50.9045		10975920
Sudan	Africa	1222053	3713	20786	0.868044	1.63383e+06	442184	55.1579	26.6422			2.88536e+07	6.09674e+06	4212	1215.9	6.76815e+06	1.27622e+06			55.1579	26.6422	4267.16	1242.55	11	157.022	977.274	41801533
Sri Lanka	Asia	1164658	12676	3777	0.566103	309197	93161	2962.95	975.052	1790.42	577.94	1.07684e+08	3.37741e+07	19914.5	6463.99	5.71546e+07	1.77346e+07	6850.05	2182.71	11603.4	3735.71	31517.9	10199.7	771	5.38957	4102.48	21670000
Spain	Europe	4188861	286305	262367	0.989256	6.53723e+06	1.39308e+06	125939	25419.4	4895.79	925.265	4.31591e+08	8.50714e+07	2.02559e+06	382070	2.66121e+08	5.34968e+07	25090	4953.58	155924	31298.3	2.18152e+06	413368	21	53.6785	30523.9	46723749	1640
South Korea	Asia	1600044	70595	23731	0.638488	2.08429e+06	507838	41449.3	10142.1	80638.1	19870.3	7.67131e+08	1.94142e+08	352382	86530.8	1.73709e+08	4.28388e+07	49563.5	12178.6	171651	42191	524032	128722	127	9.76183	31362.8	51635256	227
South Africa	Africa	4500469	18093	173146	0.807048	4.87942e+06	1.07482e+06	3098.37	658.796	641.474	137.149	1.61065e+08	3.70596e+07	289037	63490.1	8.97306e+07	1.98072e+07	3604.37	759.318	7344.21	1555.26	296382	65045.4	26	113.12	6374.02	57779622
Somalia	Africa	1576046	555	10	0.978006	569301	118423					6.48749e+06	1.32447e+06	18.1053	4.81773	7.7742e+06	1.62616e+06	72	21.4994	72	21.4994	90.1053	26.3171	0	38.4955	314.562	15008154
Solomon Is.	Oceania	15404	62	4	0.505259	434419	91706.3	18.0526	6.12349	54.1579	18.3705	5.93466e+06	1.26169e+06	71.4737	20.2741	1.93573e+06	410188	36.0526	12.2496	108.263	36.7435	179.737	57.0177	0	2.10775	2162.65	652858	1409
Slovakia	Europe	584780	52552	58352	1	909499	272760	7547.05	2251.46	695.579	205.699	7.94187e+07	2.34382e+07	412527	123744	4.07495e+07	1.20091e+07	10726.2	3160.24	18968.8	5617.39	431496	129361	0	5.92439	19546.9	5447011
Slovenia	Europe	213254	12818	16686	1	502096	105862	1443.21	295.748	510.947	106.283	38881538	8.2461e+06	206118	43347.5	23182804	4.87829e+06	2764.47	568.078	4718.63	970.109	210836	44317.6	4	2.35615	26234	2067372	3755
Singapore	Asia	38027	8460	58	1	786.421	261.736	177.947	62.2339	107	35.2326	8.73549e+06	2.95241e+06	71.3158	23.535	561633	184356	232.053	77.5962	517	175.063	588.316	198.598		0.0392321	64581.9	5638676
Sierra Leone	Africa	396913	2568	642	0.83916	433372	94814.8	361.737	93.6144	796.211	196.28	3.77968e+07	8.55567e+06	2424.26	636.102	1.99735e+07	4.27114e+06	1921.63	538.782	3079.58	828.676	5503.84	1464.78	1371	5.87917	522.858	7650154
Serbia	Europe	358162	9949	36596	0.995561	1.11814e+06	349755	3996.63	1211.88	758.105	234.797	5.67646e+07	1.73997e+07	140105	43484	1.74401e+07	5.4376e+06	2511	769.269	7265.74	2215.95	147370	45700	7	8.7463	7234	6982084	545
Senegal	Africa	917044	5327	5517	0.700652	29279.5	6451.57			36.3158	10.5885	373220	79824.6	222.053	50.2134	741192	161897	54.5789	13.8014	90.8947	24.39	312.947	74.6034	0	16.4777	1521.95	15854360
Saudi Arabia	Asia	1101364	13457	78561	0.836732	4.73637e+06	1.33031e+06	2309.21	684.683	1554	517.216	1.13039e+08	2.98566e+07	152552	41007	2.33415e+07	6.3491e+06	474.105	142.555	4337.32	1344.45	156889	42351.4	34	171.001	23219.1	33699947
SÃ£o TomÃ© and Principe	Africa	5515	123		0.988412	15154.5	4246.99	53.4211	15.9489	35.3684	17.827	1.45545e+06	407661			643951	183931	35.5789	9.55868	124.368	43.3346	124.368	43.3346	0	0.0797397	2001.14	211028
San Marino	Europe	1903	171	93	1	1784.58	616.182	196.368	67.5641			779931	269323	1623.79	562.665	311376	107610	107.053	37.1625	303.421	104.727	1927.21	667.392	0	0.00766711		33785	10
Samoa	Oceania	4268	112		0.0954087	16235.8	4055.25	35.0526	10.3359	35.0526	10.3359	1.31774e+06	347069			96535.7	23377.9	52.7895	14.2501	122.895	34.9218	122.895	34.9218	0	0.224961	4392.47	196130
St. Vin. and Gren.	Central America and Caribbean	1384	78	6	1	6225.63	2230.67	35.5789	14.0567			1.42249e+06	509110	106.684	38.2158	366146	129740	177.316	64.6676	212.895	78.7243	319.579	116.94	9	0.0258457	7377.68	110210
Saint Lucia	Central America and Caribbean	7397	480	7	0.932325	10849.2	4142.51	89.6842	34.8633	89.2632	33.5093	3.22866e+06	1.24554e+06	125.211	47.0727	1.31909e+06	505932	894.526	340.891	1073.47	409.264	1198.68	456.337	6	0.0459329	10315	181889
St. Kitts and Nevis	Central America and Caribbean	9203	191	6	0.407701	3151.42	1263.04	35.8947	14.1653			670310	271523			287822	115683			35.8947	14.1653	35.8947	14.1653	0	0.0197286	19829.4	52441
Rwanda	Africa	329395	1606	1900	0.43977	358596	73419.5	1538.16	350.175	853.474	174.055	1.83853e+08	3.79292e+07	28571.6	5964.79	4.42839e+07	9.32396e+06	1609.58	354.277	4001.21	878.507	32572.8	6843.3	109	2.05442	772.968	12301939
Russia	Europe	14648553	333353	1548049	0.423215	7.43026e+07	5.65427e+06	22659.9	2328.05	5907.32	664.922	3.7177e+08	3.41483e+07	1.26838e+06	101650	1.55355e+08	1.03449e+07	6620.74	882.332	35188	3875.3	1.30357e+06	105525	43	1138.3	11288.9	144478050	25703
Romania	Europe	1069844	40456	109914	0.997258	3.24423e+06	828102	8429.26	2150.39	2945.89	755.841	1.66708e+08	4.24516e+07	482639	125591	5.48748e+07	1.3931e+07	8526.53	2214.2	19901.7	5120.43	502541	130711	15	27.3827	12301.2	19473936	10131
Qatar	Asia	111069	1813	3470	0.915712	35.7368	15.3834					231.389	97.0823			5495.37	2498.54			0	0	0	0	5	0.990744	69026.5	2781677
Portugal	Europe	966260	55404	51772	0.991664	1.1327e+06	352993	18021.4	5600.69	3675	1185.67	1.06144e+08	3.40206e+07	444079	143431	7.67271e+07	2.49104e+07	9382.42	2975.33	31078.8	9761.69	475158	153193	74	9.52918	23145.7	10281762	107
Poland	Europe	4327672	198297	256416	1	648874	159978	7724.32	1908.75	716.737	179.01	88539236	2.19091e+07	301015	69343.2	4.3533e+07	1.07145e+07	4576.53	1163.17	13017.6	3250.93	314032	72594.1	0	41.1874	15424	37978548
Philippines	Asia	1251691	62525	48088	1	3.97577e+06	845991	9387.47	2048.9	2609.47	619.676	5.50029e+08	1.16983e+08	209839	47994.7	5.94835e+07	1.24706e+07	34677.6	7436.84	46674.6	10105.4	256513	58100.1	7646	24.0351	3102.71	106651922	28034
Peru	South America	2470652	103640	33620	1	1.30633e+07	2.90191e+06	15674.1	4474.47	5213.79	1450.18	3.71705e+08	1.05231e+08	326393	96901.3	3.38029e+08	9.09817e+07	543575	129878	564463	135803	890857	232704	441	106.512	6947.26	31989256	59635
Paraguay	South America	577543	8449	10263	1	46247.2	10937.7	53.7895	13.1638			915532	195210	5047	1197.88	350052	68847.2	196.684	42.7539	250.474	55.9177	5297.47	1253.8	0	35.3078	5871.47	6956071
Papua New Guinea	Oceania	434807	540	200	0.754819	5.45675e+06	841277	320	56.426	142.632	29.3583	117538680	2.02602e+07	1840.58	371.894	39754878	5.93355e+06	906.684	173.234	1369.32	259.019	3209.89	630.913	163	37.8102	2722.6	8606316	18216
Panama	North America	127310	2783	4868	0.937894	1.00439e+06	204906	289.421	67.9275	180.684	53.2427	3.28167e+07	8.20377e+06	36636.7	9777.87	9.81138e+06	2.31052e+06	796.316	187.476	1266.42	308.646	37903.2	10086.5	39	6.07198	15575.1	4176873	6763
Palau	Oceania	201	20		0.995877	3129.42	970.461					47447.3	15243.4			9554.53	3374.6	35.6842	12.2068	35.6842	12.2068	35.6842	12.2068	0	0.0277771	17317.9	17907
Pakistan	Asia	1437670	23805	105665	0.139288	7.50728e+06	2.26903e+06	1745.58	525.608	1238.58	353.727	684478560	1.94457e+08	141164	42329.6	8.91377e+07	2.42629e+07	11694.9	4688.81	14679.1	5568.14	155843	47897.7	1607	81.696	1472.89	212215030	4831
Oman	Asia	310989	4042	23391	0.863961	1.10199e+06	363751	1086.47	397.284	521.632	205.313	4.85734e+07	1.74706e+07	99860.2	41153.5	9.51811e+06	3.26018e+06	1467.05	564.954	3075.16	1167.55	102935	42321.1	4	26.982	16418.9	4829483
Norway	Europe	1796506	19819	49743		1.78942e+06	378955	33132.7	7967.88	1589.47	449.536	6.75928e+07	1.72792e+07	678369	156873	4.95592e+07	1.16269e+07	11063.2	2692.02	45785.3	11109.4	724154	167983	19	8.72542	81807.2	5314336
North Korea	Asia	649888	402	18028	0.662496	2.50104e+06	609066	17.7368	5.00935	17.8421	5.60023	3.90717e+08	9.56392e+07	127228	32578	6.76507e+07	1.58749e+07	53.3684	16.1803	88.9474	26.7898	127317	32604.8	218	12.9648		25549819	261
Nigeria	Africa	1110168	7626	34071	0.359996	1.52985e+06	227280	107.947	21.6268	1015.16	209.997	2.27584e+08	3.23559e+07	27456.9	4170.47	1.05065e+07	1.51119e+06	998.105	139.7	2121.21	371.324	29578.1	4541.79	39	74.8304	2028.18	195874740
Niger	Africa	537661	4062	5493	0.908958	535412	148914					2.00989e+06	358161	53.7368	11.704	626443	116768	54.1579	9.92339	54.1579	9.92339	107.895	21.6273	0	100.564	411.689	22442948
Nicaragua	Central America and Caribbean	355586	5595	2954	0.858698	1.14372e+06	269216	813.368	250.483	650.105	207.828	6.28742e+07	1.87436e+07	10379.6	3384.11	2.66293e+07	6.97903e+06	4078.05	1340.13	5541.53	1798.44	15921.2	5182.55	60	10.7229	2028.9	6465513	19
New Zealand	Oceania	1558331	25544	115542	0.926861	4.98177e+06	715638	5874	1105.06	551.211	98.3692	2.57901e+07	5.27322e+06	608508	101645	9.73011e+07	1.54179e+07	4960.16	1070.88	11385.4	2274.31	619893	103919	13	28.9996	41966	4885500	8595
Netherlands	Europe	1513170	142804	24509	1	5745.89	1174.03	303.632	66.9097	71.7368	15.2419	3.16042e+06	663546	1519.26	350.708	1.12597e+06	225143	286.368	55.4409	661.737	137.593	2181	488.301	0	4.89543	53024.1	17231017
Aruba	Central America and Caribbean	26048	317		0.949315	372.474	224.554					98486.1	59672.1			101685	62355.4			0	0	0	0		0.0128631		105845
CuraÃ§ao	Central America and Caribbean	31058	502	11	0.985068	1444.84	752.152					147223	80130.2			340725	181161			0	0	0	0		0.0355574		159849
Nepal	Asia	500832	22818	7311	1	2.92219e+06	448606	3553.63	669.325	8630.05	1519.96	2.90316e+08	4.3991e+07	56478.3	9484.46	7.08803e+07	1.0694e+07	183709	33858.3	195893	36047.6	252371	45532.1	1853	13.5161	1025.8	28087871	11373
Nauru	Oceania		6	16	0.946575															0	0	0	0	0	0.0022481	9030.07	12704
Namibia	Africa	531439	2631	132054	0.927179	1.73187e+06	834795	156.368	71.0283	52.0526	31.8669	1.30102e+06	630790	100725	49170	962476	416905	243.684	108.617	452.105	211.512	101178	49381.5	0	72.1137	5931.45	2448255
Mozambique	Africa	759050	2753	18515	0.554943	1.16992e+06	236476	107.421	29.3529	71.1053	17.9037	46221336	9.69052e+06	19527.2	5097.69	7.87489e+06	1.53062e+06	355.632	91.7038	534.158	138.96	20061.3	5236.65	44	67.1314	490.168	29495962
Morocco	Africa	626744	19646	98334	0.802819	3.74077e+06	1.22363e+06	3467.05	1146.75	664.105	220.345	1.89638e+08	6.3111e+07	470872	158726	2.69306e+07	8.7566e+06	2535.47	839.234	6666.63	2206.33	477538	160933	13	54.4179	3237.88	36029138
Montenegro	Europe	46469	6030	2852	1	350893	97541	1206	340.339	648.368	178.815	1.56683e+07	4.42899e+06	44033.4	11890.3	6.18394e+06	1.75582e+06	1639.37	448.207	3493.74	967.361	47527.2	12857.6	0	1.50621	8760.69	622345	3475
Mongolia	Asia	912863	5785	34222	0.383117	1.29535e+07	2.50807e+06	1596.05	336.949	271.158	57.529	4.42293e+07	9.28096e+06	87687.1	17020.5	2.32591e+07	4.71004e+06	364.053	80.9091	2231.26	475.388	89918.4	17495.9	0	184.59	4103.7	3170208	40
Moldova	Europe	154040	7799	98236	1	136536	29593.1	2641.26	583.983	521.526	115.89	1.60594e+07	3.4511e+06	182174	39020.8	3.92372e+06	839532	665.895	146.661	3828.68	846.535	186002	39867.4	0	3.94202	3189.36	3545883
Monaco	Europe		46	27	0.975923	372.211	130.67	204.421	71.0691			452056	161151	502.684	177.767	124497	43773.6			204.421	71.0691	707.105	248.836		0.0013901		38682
Mexico	North America	9543169	79625	135133	0.800063	2.01743e+07	2.72131e+06	12452.9	1790.65	4640.16	684.061	7.58043e+08	1.02578e+08	569425	65277.6	5.54485e+08	6.88625e+07	99573.7	16499.7	116667	18974.5	686092	84252.1	564	174.203	9698.08	126190788	61033
Mauritania	Africa	629704	3753	3983	0.803259	269237	66911.7	17.9474	5.57249			1.2699e+06	277546	1013.95	515.976	1.46929e+06	328937			17.9474	5.57249	1031.89	521.549	0	89.6353	1218.6	4403319
Malta	Europe	26277	2562	127	1	3064.16	847.172	283.105	79.0421	177.211	48.6981	2.81743e+06	782496	619.474	174.842	1.03936e+06	287752	301	83.7848	761.316	211.525	1380.79	386.367		0.027342	30074.7	483530
Mali	Africa	728410	15380	4681	0.942986	223089	33435.6	537.684	138.676	178.947	50.8773	1.31635e+07	3.07886e+06	2336.21	488.841	3.7689e+06	733623	11176.3	2054.31	11892.9	2243.86	14229.1	2732.7	0	106.802	901.403	19077690
Malaysia	Asia	435801	21235	36212	0.989743	4.14242e+06	849974	4766.37	903.721	843.526	144.419	1.93925e+08	3.50563e+07	185066	33228.7	2.66148e+07	5.13792e+06	4942.21	943.725	10552.1	1991.87	195618	35220.6	133	26.5659	11239	31528585	6
Malawi	Africa	173666	16505	9344	0.316391	615229	130922	247.053	56.7367	406.105	94.4386	6.43752e+07	1.51671e+07	30762.6	6714.18	5.04325e+06	1.07855e+06	4913.32	1395.31	5566.47	1546.49	36329.1	8260.67	3	9.95789	389.398	18143315
Madagascar	Africa	892702	5318	598	0.589689	6.02539e+06	1.47382e+06	811.474	244.742	704.316	209.487	2.54265e+08	6.49482e+07	8281.79	3008.85	63579176	1.61615e+07	5634.79	1557.48	7150.58	2011.71	15432.4	5020.56	101	51.0559	460.753	26262368
Macedonia	Europe	72498	3334	3074	1	532127	163145	1345.05	408.913	600.895	177.392	4.28713e+07	1.29549e+07	26496.3	8226.72	5.7454e+06	1.73694e+06	866.421	261.376	2812.37	847.681	29308.6	9074.4	6	2.7431	6083.72	2082958	2047
Luxembourg	Europe	90911	13289	7725	1	44690.4	10130	2733.58	636.694	55	12.3648	8.74465e+06	2.02742e+06	59937.9	13538.4	7.55869e+06	1.72399e+06	1512.79	344.774	4301.37	993.833	64239.3	14532.3	0	0.327059	114340	607728
Lithuania	Europe	542965	11579	60058	0.973063															0	0	0	0	0	9.1727	19089.7	2789533
Liechtenstein	Europe	1296	522	213	1	2871.37	750.73	496.316	126.334			575938	149066	463.263	131.379	80396.1	22999.3	166.211	44.5004	662.526	170.835	1125.79	302.214	0	0.0164023		37910	50
Libya	Africa	1601027	9424	82283	0.751383	912717	308153	711.632	207.334	362.105	109.82	5.28368e+06	1.46644e+06	26985.2	7046.18	8446113	2.18352e+06	1393.89	435.953	2467.63	753.108	29452.8	7799.29	0	147.893	7235.03	6678567
Liberia	Africa	291203	24581	414	0.87276	396053	89304.7	18.2105	6.56234	54.4211	11.796	1.21167e+07	2.62387e+06	144.579	37.7732	9.16101e+06	1.98457e+06	271.316	63.3299	343.947	81.6882	488.526	119.461	21	7.78766	674.209	4818977
Lesotho	Africa	44610	2498	5000	0.988062	577369	176432	300.263	98.1749	141.368	46.3348	28984142	8.87196e+06	35389.5	10473	5.26262e+06	1.60408e+06	1853.95	615.286	2295.58	759.796	37685.1	11232.8	0	2.79261	1324.28	2108132
Lebanon	Asia	157839	3775	1452	0.792218	196323	71246.5	4815.58	1638.35	1110.26	384.271	7.67534e+07	2.61466e+07	13478.3	4727.84	2.383e+07	8.21855e+06	4197.58	1368.58	10123.4	3391.2	23601.7	8119.04	2	0.975796	8269.79	6848925
Latvia	Europe	590089	10123	33229	0.994557	90.4737	28.2496					3391.71	1091.71			10299.2	3281.41			0	0	0	0	0	9.50481	18088.9	1926542
Laos	Asia	376381	7337	9479	0.778809	3.89875e+06	580238	8178.58	1398.69	489.684	86.7737	6.47033e+07	1.0089e+07	62773.8	9638.3	2.61834e+07	3.99876e+06	2348.63	437.131	11016.9	1922.59	73790.7	11560.9	27	19.5388	2567.54	7061507	1098
Kyrgyzstan	Asia	443135	6934	10507	0.852889	4.45208e+06	1.06008e+06	2919.84	687.184	890.158	219.48	1.03635e+08	2.54596e+07	92692.8	24714.1	3.30148e+07	7.97196e+06	1498.89	391.162	5308.89	1297.83	98001.7	26012	107	21.4422	1281.36	6315800	32616
Kuwait	Asia	22940	1256	14710	1	109.211	36.0841					195137	65390	54.4737	17.0077	1361.84	457.755	54.4737	18.3102	54.4737	18.3102	108.947	35.3179	1	1.60777	34244	4137309
Kosovo	Europe	19590	4257	2338		200649	64970.4	1114.26	361.748	426.368	137.789	31378180	1.02814e+07	10939.5	3611.06	2.11994e+06	689768	1916.37	621.334	3457	1120.87	14396.5	4731.93	0	1.19836	4281.29	1845300	243
Kiribati	Oceania	0	30	2	0.0381793	70.5263	45.7668													0	0	0	0		0.0759221	1625.29	115847
Kenya	Africa	1164284	38121	14481	0.711844	1.87929e+06	519882	2764.58	919.169	1749.11	531.433	2.26553e+08	6.73054e+07	35532.7	10480.8	4.52743e+07	1.36344e+07	21636.1	6724.55	26149.8	8175.16	61682.5	18655.9	180	48.1486	1710.51	51393010
Kazakhstan	Asia	5366949	19509	184302	0.292144	4.60145e+06	1.01836e+06	1481.21	525.416	53.1579	16.1667	56428014	1.67565e+07	69814.6	18446.6	3.17305e+07	7.1098e+06	464.105	160.091	1998.47	701.674	71813.1	19148.3	56	329.368	9331.05	18276499	11352
Jordan	Asia	271079	4399	5321	1	272919	82471.6	1643.05	463.46	1430.21	458.526	9.87968e+07	2.91437e+07	23570.5	7051.01	1.5834e+07	4.59076e+06	1941.37	617.712	5014.63	1539.7	28585.1	8590.7	3	8.40743	4247.77	9956011
Japan	Asia	6259081	411035	194634	1	7.30828e+06	1.15483e+06	41407	7120.3	35289.5	6699.83	1.34506e+09	2.36674e+08	1.86343e+06	317026	5.17172e+08	9.04707e+07	159271	30336	235968	44156.1	2.0994e+06	361182	344	37.8612	39286.7	126529100	78520
Jamaica	Central America and Caribbean	307197	1252	1158	1	182808	67981.3	161.211	59.2589	144.211	52.335	4.50688e+07	1.75415e+07	14538.2	5026.28	3.79205e+07	1.39651e+07	2176	825.44	2481.42	937.034	17019.6	5963.32	20	0.930504	5355.58	2934855	1594
Italy	Europe	4246972	343118	379545	1	5.53897e+06	961566	173701	32448	12156.5	2508.31	5.68194e+08	1.06313e+08	3.19231e+06	542507	3.38609e+08	6.27351e+07	45444.6	8038.4	231302	42994.7	3.42362e+06	585501	96	33.1344	34318.4	60431283	27666
Israel	Asia	269958	14760	10816	0.981259	191664	49278.8	3009	919.261	244.526	64.7005	5.79679e+07	1.63429e+07	52849.3	13979.1	1.6182e+07	4.38766e+06	2202.63	640.048	5456.16	1624.01	58305.5	15603.1	3	2.11316	41614	8883800
West Bank and Gaza	Asia	243514	12169	345	1	111407	30171.9	5031.63	1404.38	3809.89	1052.55	62768736	1.70126e+07	4200.05	1211.73	3.22126e+07	8.76151e+06	26744.1	7357.03	35585.6	9813.96	39785.6	11025.7	4	0.603468	3198.87	4569087
Ireland	Europe	781921	26194	161532	0.982648	369248	78516.3	1538.21	335.088	198.842	41.8413	9.80978e+06	2.01851e+06	229992	48670.1	1.26727e+07	2.64536e+06	1991.11	426.02	3728.16	802.95	233721	49473	2	9.27129	78806.4	4853506
Iraq	Asia	1947909	27295	34593	0.646969	729612	253600	4264.89	1583.32	3281.84	1207.72	1.025e+08	3.63549e+07	28329.1	9842.12	2.334e+07	8.0675e+06	7448.21	2705.15	14994.9	5496.19	43324.1	15338.3	0	42.2315	5878.04	38433600
Iran	Asia	2098409	47572	238855	0.248906	1.6475e+07	3.48743e+06	18203.2	3938.54	2997	639.606	933843328	1.88462e+08	1.05409e+06	208462	1.0316e+08	2.16256e+07	8986.68	1914.68	30186.8	6492.83	1.08428e+06	214955	33	156.031		81800269	79
Indonesia	Asia	4982987	50045	53822	0.522078	1.78994e+07	3.43398e+06	4137.74	851.265	2962.53	556.626	1.74772e+09	3.718e+08	191625	39858.1	216951872	3.97269e+07	21872.7	4415.99	28973	5823.88	220598	45682	3061	151.78	3893.6	267663435	55126
India	Asia	13691315	94674	1291151	0.364736	1.72264e+07	2.03253e+06	10593.3	1532.97	9789.16	1584.25	3.2258e+09	3.97997e+08	1.41946e+06	180707	3.95167e+08	4.66604e+07	23935.3	3356.47	44317.8	6473.69	1.46378e+06	187181	11020	278.347	2015.59	1352617328	33534
Hungary	Europe	997012	86059	196900	1	365058	119889	2699.32	932.69	705.842	240.789	41548845	1.41917e+07	282366	100826	1.91445e+07	6.365e+06	3095.11	1045.84	6500.26	2219.32	288866	103045	8	11.0584	15938.8	9768785
Honduras	Central America and Caribbean	185854	2721	1232	0.643778	1.82561e+06	461782	1014.74	227.142	720.526	185.203	1.31109e+08	3.07213e+07	11851.8	3153.18	2.23687e+07	5.65657e+06	2585.11	628.538	4320.37	1040.88	16172.2	4194.07	76	9.4976	2482.73	9587522	10320
Haiti	Central America and Caribbean	235112	17931	4024	0.941802	437084	112476	1996.16	530.126	14241	3570.48	1.50355e+08	3.82483e+07	20323.9	5353.32	2.87521e+07	7.21336e+06	56139.2	14583.7	72376.4	18684.3	92700.3	24037.6	3754	2.29206	868.285	11123176	26
Guyana	South America	50905	1231	38	1	549221	127540	35.5263	11.7774			283011	82489.9	35.6842	8.62202	1.62715e+06	456116	18	5.61743	53.5263	17.3949	89.2105	26.0169	1	17.2109	4634.68	779004
Guinea-Bissau	Africa	158540	91	3	0.269369	1570.95	310.838					10785	2123.95			12997	2667.93			0	0	0	0	0	2.65104	777.97	1874309
Guinea	Africa	1210202	5320	1545	1	1.19545e+06	242006	255.684	68.3423	329.053	74.7496	5.92222e+07	1.37202e+07	11881.1	4157.28	5.52395e+07	1.17463e+07	1056.58	256.729	1641.32	399.821	13522.4	4557.1	65	20.1465	885.251	12414318
Guatemala	Central America and Caribbean	503460	6635	2108	0.473236	1.3668e+06	306414	4821.26	1344.09	1291.95	364.846	2.71619e+08	7.00398e+07	25779.5	6811.95	6.97877e+07	1.76303e+07	5926.58	1709.63	12039.8	3418.56	37819.3	10230.5	2204	9.11494	4549.01	17247807	16157
Grenada	Central America and Caribbean	5877	85	944	0.939939	5638.05	1328.3	129.263	26.8325	18.4737	3.83505	1.78309e+06	403710	17191.2	5114.31	743179	163779	36.6842	8.8069	184.421	39.4744	17375.6	5153.78	1	0.0236603	10833.7	111454
Greece	Europe	1311587	52668	34900	0.939935	2.51263e+06	602220	21006.8	4557.89	1910.05	432.066	1.15035e+08	2.6302e+07	335262	77902	1.02429e+08	2.33593e+07	8393.37	1954.45	31310.3	6944.41	366572	84846.4	14	13.5665	20324.3	10727668	12354
Ghana	Africa	340688	9598	11229	0.45386	356575	68305.9	1514.37	323.984	463.684	106.326	46335554	9.56262e+06	16248.6	3631.63	2.96825e+06	651074	2391.32	522.643	4369.37	952.954	20618	4584.59	34	19.5721	2202.31	29767108
Germany	Europe	10514113	1330373	1039574	1	2.99359e+06	680630	124385	28530.2	8456.42	2017.84	575309088	1.31351e+08	4.71851e+06	1.05986e+06	4.22425e+08	9.61258e+07	55854.1	12597	188696	43145.1	4.90721e+06	1.10301e+06	6	45.903	48195.6	82927922	710
Georgia	Asia	160335	16146	13676	1	1.45368e+06	271961	8105.11	1570.3	2372.79	505.968	6.094e+07	1.167e+07	124442	22924.8	1.5316e+07	2.78326e+06	15439.1	2811.72	25917	4887.99	150359	27812.8	35	7.56305	4344.63	3731000	17216
Gambia	Africa	58186	393	1	0.610712															0	0	0	0	0	0.857667	712.452	2280102
Gabon	Africa	144376	567	952	1	228817	36264.4	90.1053	19.1221	18.1053	4.72458	1.7735e+06	295725	2232.37	470.543	4.75755e+06	952552			108.211	23.8467	2340.58	494.39	7	21.0888	8029.82	2119275
France	Europe	9009849	563644	693713		5.61504e+06	784610	150862	21591.9	5844.89	817.51	4.42815e+08	6.36861e+07	3.58231e+06	570995	4.00894e+08	5.76572e+07	178446	28180.6	335153	50590.1	3.91746e+06	621585	18	71.4927	41463.6	66987244	6545
St-Martin	Central America and Caribbean		83	42	1	655.789	276.718	17.7368	7.51178			548133	231291	975.421	412.714	197560	83380	283.579	119.658	301.316	127.17	1276.74	539.884		0.00416974		37264
Fr. Polynesia	Oceania	2207	695	65	0.995792	39547.4	14996.6	214.842	72.6049	19.3529	14.4954	3.70698e+06	1.37549e+06	1092.42	440.762	177684	69656.1	337.684	124.503	571.879	211.603	1664.3	652.366	0	0.219168		277679
New Caledonia	Oceania	28533	1046	1145	1	189327	65152.3	246.105	84.0495	17.5263	6.8343	1.9145e+06	656331	8576.05	3001.12	2.00718e+06	700824	457.421	158.602	721.053	249.486	9297.11	3250.61	2	1.62052		284060	560
Finland	Europe	2557006	95	246	1	18.1053	6.25295					451.564	155.955							0	0	0	0	0	0.0476611	49648.1	5518050
Fiji	Oceania	15314	656	393	0.696535	296692	88114.6	107.053	27.6817	71.4737	19.8028	5.86005e+06	1.72853e+06	5317.74	1636.47	1.35651e+06	403970	234.474	67.5922	413	115.077	5730.74	1751.55	13	1.56044	6202.16	883483
Ethiopia	Africa	953790	6471	36826	0.422898	9.61427e+06	1.06169e+06	1627.84	271.005	1157.37	185.517	1.18829e+09	1.49656e+08	229217	30324.1	6.16299e+07	7.08741e+06	5408.47	838.142	8193.68	1294.66	237411	31618.8	75	92.6846	772.312	109224559
Estonia	Europe	450079	6511	44915	0.957128	476.632	137.559	18.2632	5.38354			304493	91775.2	128.211	45.3267	63577.3	19286.5			18.2632	5.38354	146.474	50.7102	0	7.07054	22927.7	1320884
Eritrea	Africa	88986	360	408	0.819733	1.36506e+06	282573					6.33817e+07	1.298e+07	3025.79	761.2	6.83232e+06	1.33442e+06	90.7895	18.1646	90.7895	18.1646	3116.58	779.365	0	10.3758
Eq. Guinea	Africa	31465	146	2526	0.608703	98973.9	24183.3			17.9474	5.80683	3.62813e+06	890531	5597.37	1498.28	1.18248e+06	282067	18.0526	5.43112	36	11.238	5633.37	1509.52	0	2.15596	10174	1308974
El Salvador	Central America and Caribbean	345556	3035	2177	0.745598	307314	84914.4	719.789	197.368	432.421	117.437	8.47989e+07	2.27614e+07	20556.1	5658.07	4.30421e+07	1.17478e+07	3389.21	946.508	4541.42	1261.31	25097.5	6919.38	223	1.69785	4058.24	6420744	6011
Egypt	Africa	711177	6360	84967	0.174652	575345	184964	218.842	69.0598	79.4737	29.4305	1.28858e+07	4.83039e+06	21548.8	7409.32	3.01596e+06	1.02397e+06	137.316	55.5618	435.632	154.052	21984.4	7563.38	123	90.7975	2549.14	98423595
Ecuador	South America	922993	29164	13984	0.978057	2.99843e+06	649089	7925.84	1946.96	7837.21	1946.19	1.72644e+08	4.72378e+07	118676	30808.9	1.0367e+08	2.86298e+07	39105.7	11495.8	54868.7	15389	173544	46197.8	73	20.6901	6344.87	17084357	25967
Dominican Rep.	Central America and Caribbean	162679	6092	7232	0.755824	560098	190535	1526.37	510.334	390.105	129.939	6.72854e+07	2.20523e+07	33166.1	10751.5	6.28008e+06	2.10348e+06	2158.84	723.663	4075.32	1363.94	37241.4	12115.4	24	4.15373	7650.07	10627165	3537
Dominica	Central America and Caribbean	25324	127	4	1	14079.5	5407.62	17.6842	6.94464	17.5789	7.37349	1.40145e+06	539991	70.4737	28.2791	1.39142e+06	535942	141	55.1322	176.263	69.4503	246.737	97.7294	23	0.0585535	7031.71	71625	49
Djibouti	Africa	66746	188	715	0.416231	243559	60612.3	36.2105	12.8391			6.20274e+06	1.63472e+06	3890.32	1142.45	6.78721e+06	1.71635e+06	18.2632	5.57616	54.4737	18.4152	3944.79	1160.86	0	1.79298	2050.2	958920
Denmark	Europe	1018224	105141	268407	0.925671	961096	196691	343.526	79.9641	54.2632	13.3327	1.09533e+08	2.33925e+07	1594.05	350.067	1.05086e+06	233041	197.632	45.2367	595.421	138.533	2189.47	488.601	0	6.1324	60726.5	5797446
Czechia	Europe	1611832	1921	1703		26452.9	7869.72	20099.7	4426.46	1242.68	266.077	2.40923e+06	716246	1.415e+06	315563	84840176	1.80215e+07	8253.68	1746.54	29596.1	6439.07	1.4446e+06	322003	0	9.82098	23078.6	10625695
Cyprus	Asia	114707	5024	2051	0.970175	98507.4	35710	605.579	227.767	106.737	39.908	4.61024e+06	1.71418e+06	17970.9	6555.16	8.02826e+06	2.94293e+06	642.316	236.531	1354.63	504.206	19325.6	7059.36	2	0.563019	28159.3	1189265	20
Cuba	Central America and Caribbean	738617	13972	15519	1	436812	108473	1021.68	257.586	323.474	78.8376	4.73261e+07	1.22347e+07	22370.1	5418.36	1.82203e+07	4.49396e+06	2064.16	473.333	3409.32	809.757	25779.4	6228.12	0	9.51007		11338138	940
Croatia	Europe	556671	19499	20794	0.942397	802812	203692	4134.89	992.474	791.053	187.191	5.02368e+07	1.23746e+07	129779	31542.1	3.64014e+07	8.91599e+06	3092.95	757.424	8018.89	1937.09	137798	33479.2	0	6.23397	14869.1	4089400	98
CÃ´te d'Ivoire	Africa	543161	18252	9178	0.61317	412378	69257.8	197.158	30.9485	307.211	48.4981	2.98811e+07	4.85272e+06	7673.58	1303.34	3.77856e+06	627531	645.842	102.114	1150.21	181.561	8823.79	1484.9	93	26.3082	1715.53	25069229
Costa Rica	Central America and Caribbean	233298	9066	4238	0.933043	694649	207065	1725.74	555.968	535	165.249	5.43846e+07	1.5315e+07	43173	13128.5	2.1837e+07	6.22429e+06	5366.95	1567.53	7627.68	2288.75	50800.7	15417.2	59	4.23049	12026.5	4999441	12530
Dem. Rep. Congo	Africa	1977169	9038	13659	0.343254	6.68797e+06	770865	374.737	81.1753	3227.11	647.781	3.80439e+08	4.82077e+07	54725.9	8862.55	4.9157e+07	6.32616e+06	27056.6	4219.73	30658.5	4948.69	85384.4	13811.2	571	189.613	561.777	84068091
Congo	Africa	255830	1546	3469	0.922771	930514	165075	53.4211	12.3122	142.368	36.8589	1.2144e+07	2.72071e+06	11165.6	2247.82	2.66748e+06	529317	231.632	54.808	427.421	103.979	11593	2351.8	16	28.0807	2147.77	5244363
Comoros	Africa	4179	213	6	0.56409	19270.6	6642.85	17.4211	7.39606	104.842	37.0529	8.73741e+06	3.17156e+06	52.2632	15.7475	424610	150784	121.632	44.1955	243.895	88.6445	296.158	104.392	0	0.131067	1445.45	832322
Colombia	South America	4557409	39560	20413	0.728795	7.33683e+06	1.60409e+06	19757	5190.38	11591.4	2705.68	6.15584e+08	1.54708e+08	200775	50503.3	4.28418e+08	1.07713e+08	55936.2	13291.5	87284.6	21187.6	288059	71690.8	1434	92.5234	6651.29	49648685	71932
China	Asia	27240505	66866	1086776	0.242947	1.14935e+08	1.08944e+07	32223.7	2888.94	5754.95	693.728	1.01147e+10	1.03811e+09	4.51392e+06	483079	1.31358e+09	1.20978e+08	14912.1	2187.47	52890.7	5770.14	4.56681e+06	488850	8620	950.981	9770.85	1392730000	59941
Macao	Asia		62	33	1	179.789	52.7263	36	11.1555	18	5.57773	256592	76179.6	646.526	184.468	45274.4	13505.9	18	5.57773	72	22.3109	718.526	206.779	0	0.00198672	86355.4	631636
Hong Kong	Asia	50198	7741	792	0.98229	18419	5649.05	886.263	282.846	289.526	98.9587	1.03777e+08	3.29323e+07	13833.3	4264.54	4.71435e+06	1.48303e+06	1792.74	596.622	2968.53	978.426	16801.8	5242.97	1	0.0900072	48717.3	7451000
Chile	South America	1396024	34662	76281	1	1.10913e+07	1.87689e+06	4765.58	1135.47	3086.84	802.769	1.90507e+08	5.01865e+07	256894	66496.4	86318712	1.88487e+07	9678.84	2654.63	17531.3	4592.86	274425	71089.3	78	76.8557	15923.4	18729160	25375
Chad	Africa	627776	2180	1202	0.581925	1.12502e+06	335628					3.39632e+06	628027	17.7895	8.03865	2.89677e+06	656900	24.8421	6.79267	24.8421	6.79267	42.6316	14.8313	0	106.83	730.245	15477751
Central African Rep.	Africa	295101	1857	765	0.989752	200912	26262.7			180.737	26.6643	2586311	327764	214.842	43.7864	1.29662e+06	147430	396.526	58.8401	577.263	85.5043	792.105	129.291	62	50.5756	509.971	4666377
Cabo Verde	Africa	24000	669	164	1	47579.7	19954.9	319.947	132.849	426.474	187.958	8.39209e+06	3.64346e+06	2305.05	1070.56	3.03647e+06	1.27689e+06	426.053	190.81	1172.47	511.617	3477.53	1582.18		0.3016	3654.01	543767
Canada	North America	5132606	138231	337680	0.992903	3.97621e+07	4.30374e+06	8435.68	1191.59	1255.11	208.675	56250490	8.51111e+06	736717	104345	6.2755e+07	7.54412e+06	6527.37	975.383	16218.2	2375.65	752936	106721	25	800.029	46210.5	37058856
Cameroon	Africa	846158	6395	46926	1	1.82497e+06	331941	362.263	93.4475	864.158	178.784	1.21884e+08	2.26593e+07	48690.3	13960.9	2.44966e+07	4.69276e+06	3466.84	760.603	4693.26	1032.83	53383.5	14993.7	27	37.9008	1526.88	25216237
Cambodia	Asia	670138	9957	3002	0.745728	571411	117283	603.579	113.374	72.5789	15.8616	1.64684e+07	2.85879e+06	5086.58	1279.39	5.27152e+06	901867	404.789	76.8307	1080.95	206.066	6167.53	1485.46	12	15.0395	1512.13	16249798	137
Myanmar	Asia	1001828	19519	17093	0.465588	9.1224e+06	1.20254e+06	2835.32	540.868	869.368	155.732	3.47513e+08	5.21932e+07	43663.5	8759.89	9.359e+07	1.30475e+07	6505.37	1252.51	10210.1	1949.11	53873.5	10709	1027	57.6002	1325.95	53708395	10248
Burundi	Africa	223878	2727	793	0.867417	371529	79208.9	321.263	72.0624	14066.9	2922.5	1.61931e+08	3.5036e+07	5928.79	1141.56	2.78571e+07	6.06325e+06	2084.37	439.577	16472.6	3434.14	22401.4	4575.7	21	2.20434	275.43	11175378
Burkina Faso	Africa	370771	5432	4564	0.934506	37602.2	5472.09					2.62145e+06	425084	273.211	40.8719	418671	73489.4	90.8421	14.4732	90.8421	14.4732	364.053	55.3451	104	22.6572	731.172	19751535
Bulgaria	Europe	710186	20076	61786	0.974706	1443158	509946	5131.16	1809.6	1191.26	418.805	80089532	2.77546e+07	349104	125550	4.25874e+07	1.49121e+07	1977.79	713.049	8300.21	2941.45	357404	128491	19	12.3864	9272.63	7024216	2267
Brunei	Asia	6467	1046	708	0.877685	29197.4	8308.32	35.7368	13.6008	35.4737	13.6925	2.18061e+06	755009	1334.21	477.182	259623	85438.5	196.158	67.2088	267.368	94.5022	1601.58	571.684	5	0.460178	31627.7	428962	50
Brazil	South America	8440125	123591	782818	1	2.55799e+07	4.72902e+06	39532	8516.3	12769.4	2767.1	9.10075e+08	2.07328e+08	2.43785e+06	501331	2.96828e+08	5.91103e+07	63443.6	15001.4	115745	26284.8	2.55359e+06	527616	1918	706.654	8920.76	209469333	39
Botswana	Africa	715655	1417	5184	0.613703	43419.6	15892.3	210.053	82.5876	35.1053	13.8399	1.4178e+06	554760	894.211	361.059	265993	94127.4	122.684	46.7547	367.842	143.182	1262.05	504.241	0	50.7482	8258.64	2254126
Bosnia and Herz.	Europe	135392	9048	13906	0.968789	1.17504e+06	335075	6211.84	1715.21	661.158	197.385	8.34114e+07	2.43716e+07	161307	46484.9	1.4887e+07	4.16266e+06	4727.37	1406.24	11600.4	3318.84	172908	49803.8	11	5.82858	5951.32	3323929	7489
Bolivia	South America	1324718	23043	11226	1	6.76842e+06	1.37508e+06	10323.1	2156.79	6231.79	1343.26	1.14582e+08	2.43634e+07	113661	25386.9	6.09454e+07	1.25751e+07	64735.8	14378.4	81290.7	17878.5	194951	43265.3	60	92.1885	3548.59	11353142	7122
Bhutan	Asia	33737	852	1599	0.171434	943672	123828	309.474	48.9743	746.474	117.308	1.96995e+07	2.68811e+06	27821.1	4401.3	5.88918e+06	805187	2350.42	418.391	3406.37	584.674	31227.4	4985.97	50	3.63311	3360.27	754394	595
Benin	Africa	254804	4630	11945	0.820967	55890.1	7015.55	162.316	22.6692	162.579	27.8215	2.73464e+06	338796	53.8947	8.41886	924401	116594	325.895	42.3948	650.789	92.8856	704.684	101.304	0	9.56745	901.954	11485048
Belize	Central America and Caribbean	124786	801	1242	1	171532	40249	166.263	41.4472			2.42529e+06	580077	2195.26	618.633	5.94834e+06	1.34245e+06	367.368	88.4724	533.632	129.92	2728.89	748.552	0	1.92881	5025.18	383071	24
Belgium	Europe	1222545	83659	42320	1	167270	41085.9	6209.11	1536.39	651.263	159.973	3.34557e+07	8.08767e+06	90187.2	22328.4	25537772	6.20886e+06	4964.53	1199.87	11824.9	2896.23	102012	25224.7	1	3.9064	46556.1	11422068
Belarus	Europe	1603011	39923	252790	0.904198	289.421	54.5602					11137.4	2149.97	89.9474	20.8313	34810.1	6517.77			0	0	89.9474	20.8313	0	28.1303	6289.94	9485386
Barbados	Central America and Caribbean	23730	117	1	1	2400	813.885	18.2105	6.67149			744237	245563			625053	208992	72.7368	24.9641	90.9474	31.6356	90.9474	31.6356	1	0.0323376		286641
Bangladesh	Asia	2297622	19493	18441	0.189519	208826	39581.4	17.8421	4.43801	18.0526	4.40295	3.96333e+07	7.91992e+06	1756.84	424.864	7.43449e+06	1.48637e+06	145.316	29.9705	181.211	38.8114	1938.05	463.676	747	11.9996	1698.26	161356039	1146
Bahrain	Asia	3374	755	11	0.980654	17.8947	7.7667					5984.42	2597.37			1306.32	566.969			0	0	0	0	1	0.048743	24050.8	1569439
Bahamas	Central America and Caribbean	39805	352	479	1															0	0	0	0	0	1.12456		385640
Azerbaijan	Asia	235834	8489	16742	0.711579	1.01891e+06	178895	2160.16	444.946	1290.21	259.587	7.76627e+07	1.3333e+07	66806.8	14457.1	9.90265e+06	1.85759e+06	3288.32	620.614	6738.68	1325.15	73545.5	15782.3	7	9.16192	4721.18	9942334	6948
Austria	Europe	1578849	160354	243523	1	1972354	314481	31506.2	5271.21	1259.74	219.427	1.3682e+08	2.30844e+07	2779916	458280	1.51613e+08	2.54404e+07	19430.5	3168.5	52196.4	8659.13	2.83211e+06	466939	11	10.0622	51512.9	8847037	6259
Australia	Oceania	8492010	103017	282939	1	1.03941e+07	2.30863e+06	10200.6	2254.52	961.421	203.087	4.97031e+07	1.09893e+07	642001	146757	9.51723e+07	2.02375e+07	9886.37	2449.51	21048.4	4907.12	663049	151664	12	695.917	57305.3	24992369	450
Armenia	Asia	153164	6808	19551	0.944481	549852	129163	8615.47	2144.21	1682.05	446.641	3.71478e+07	9.26796e+06	202287	48056.8	9.54005e+06	2.32508e+06	4684.53	1131.84	14982.1	3722.68	217269	51779.5	5	3.13411	4212.07	2951776	5178
Argentina	South America	10226626	73987	133388	1	1.04603e+07	2.12237e+06	5237.63	842.534	1420.58	269.415	7.93989e+07	1.63376e+07	73283.9	13838.5	1.06902e+08	1.97156e+07	5135.84	834.301	11794.1	1946.25	85078	15784.7	31	278.472	11652.6	44494502	8133
Antigua and Barb.	Central America and Caribbean	14393	148	3	0.0021355	1711.68	726.527	35.5789	15.7984			362694	155613			394958	170832	71.3684	31.6986	106.947	47.497	106.947	47.497	0	0.0366615	16864.4	96286
Angola	Africa	1626563	2827	15049	0.603906	2.52783e+06	522527	122.947	31.9713			6.6259e+07	1.62075e+07	18939.7	4415.18	3.30343e+06	726299	34.8947	10.5982	157.842	42.5695	19097.6	4457.75	20	103.587	3432.39	30809762
Andorra	Europe	720	471	268	1	12418.8	3194.03	746.684	180.667	195.737	50.8351	1.84429e+06	466746	5062.84	1299.76	103145	26055	212.789	54.7586	1155.21	286.261	6218.05	1586.03	5	0.0484984	42029.8	77006
Algeria	Africa	754440	29627	133589	0.98409	6.02152e+06	1.45618e+06	19243.6	5140.08	3093.63	798.285	3.78364e+08	9.61492e+07	331978	77302.5	2.0027e+07	4.66966e+06	17423.2	4635.52	39760.4	10573.9	371738	87876.4	16	213.67	4278.85	42228429
Albania	Europe	510281	7273	7311	0.750522	664875	201982	5987	1768.7	623.263	188.84	4.29147e+07	1.30747e+07	86669.9	26806.1	7.18642e+07	2.19516e+07	2548.37	778.596	9158.63	2736.13	95828.6	29542.2	5	3.04339	5253.63	2866376	6749
Afghanistan	Asia	1205341	1992	7118	0.0964243	8.98029e+06	3.72878e+06	538.947	284.411	733.474	401.521	4.60624e+08	2.05666e+08	40671.6	18024.8	1.07687e+08	4.49756e+07	3250.53	1398.03	4522.95	2083.96	45194.5	20108.8	692	62.5579	520.897	37172386	3249
Sint Maarten	Central America and Caribbean	7533	164	21	0.954195	674.053	284.769	124.158	52.5825	17.7368	7.51178	768157	324737	88.6842	37.5589	326332	138082	53.2105	22.5354	195.105	82.6296	283.789	120.189		0.00355868		40654
